# Supplementary material for: A new family of uncultivated bacteria involved in methanogenesis from the ubiquitous osmolyte glycine betaine in coastal saltmarsh sediments
Source: PubMed Central journal article supplement (PMC6716910; doi:10.1186/s40168-019-0732-4), 2019-08-27

Figure S1

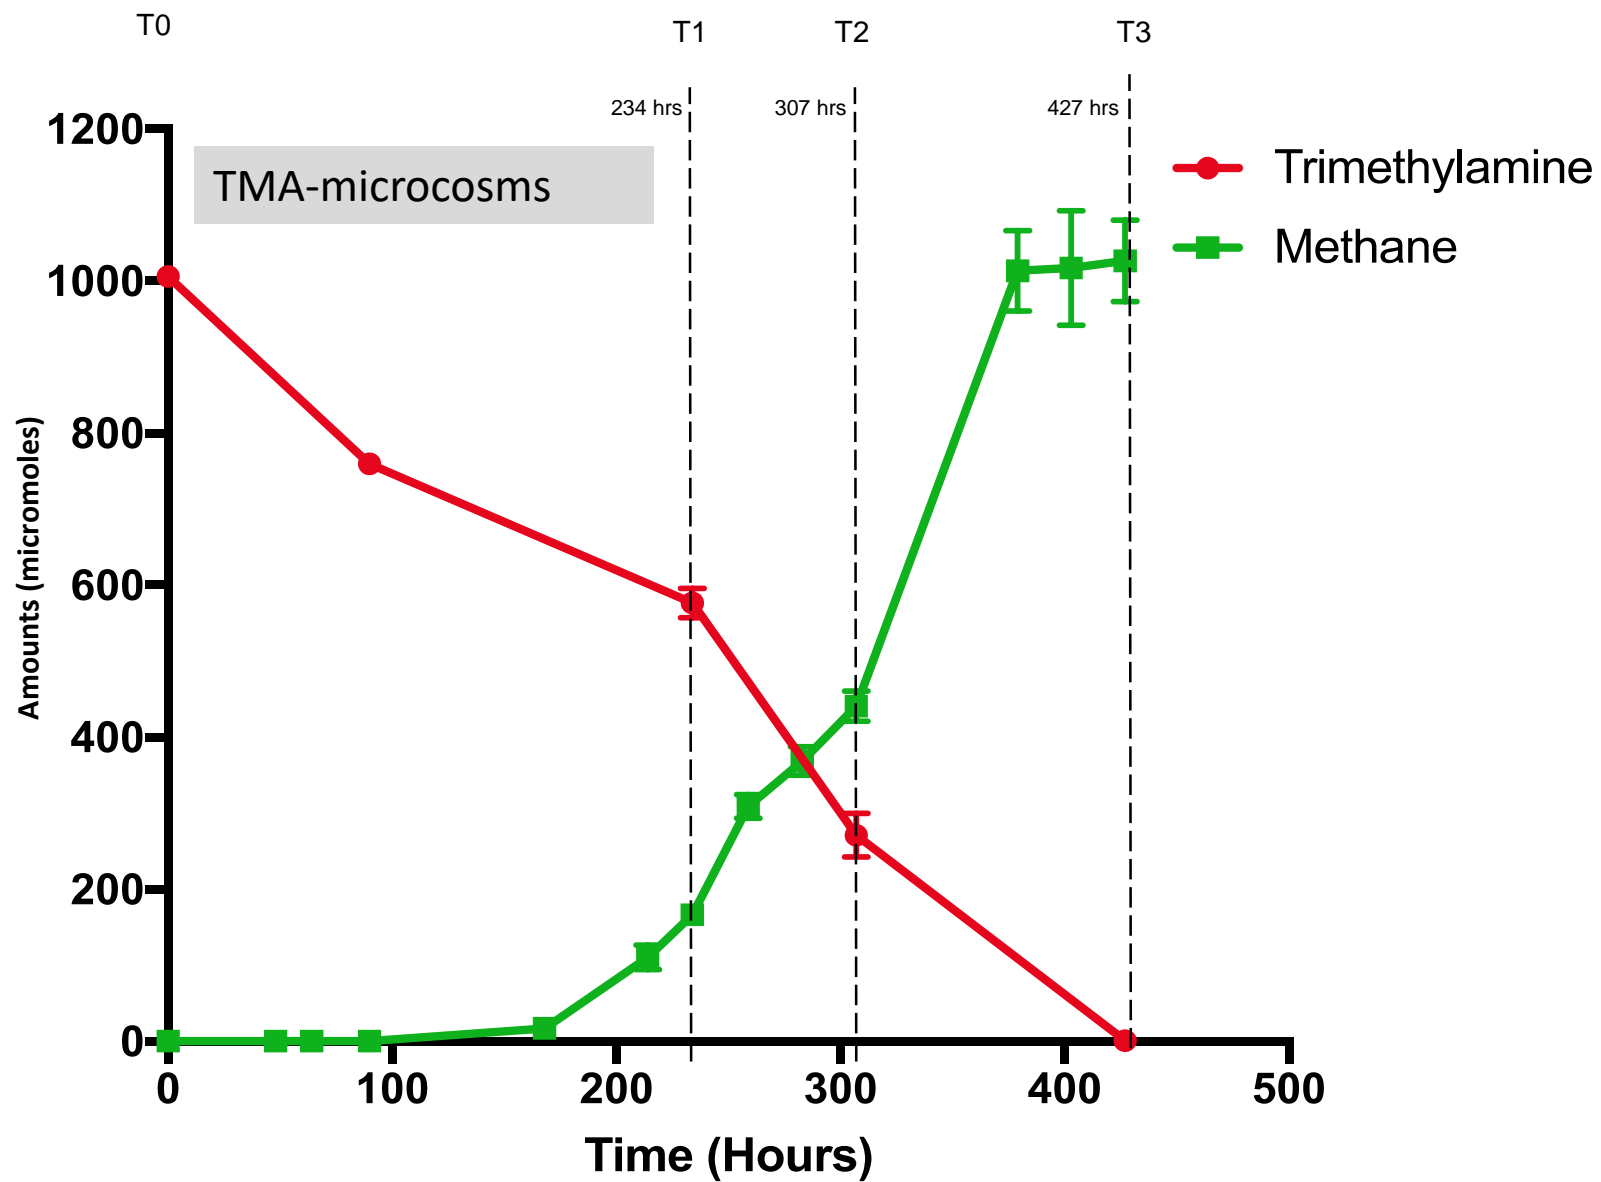

Figure S2

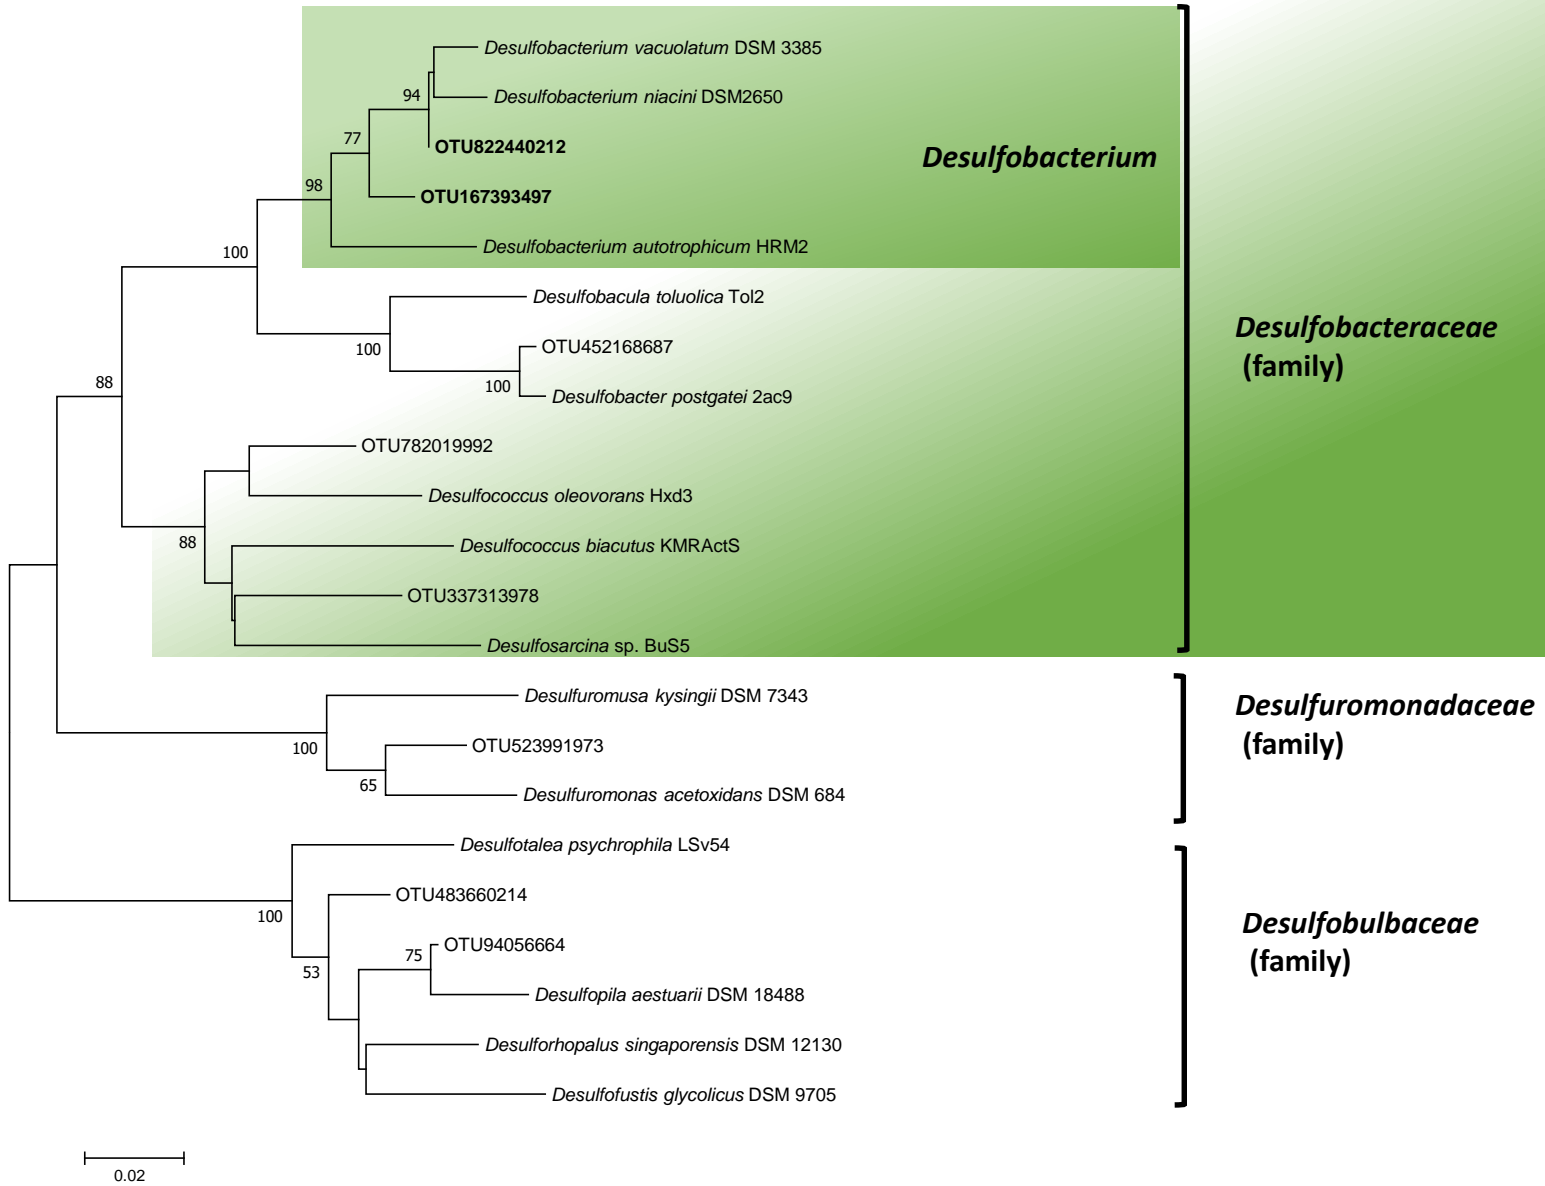

GBT microcosms

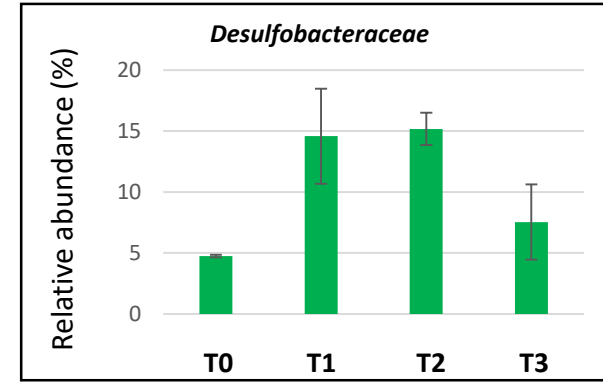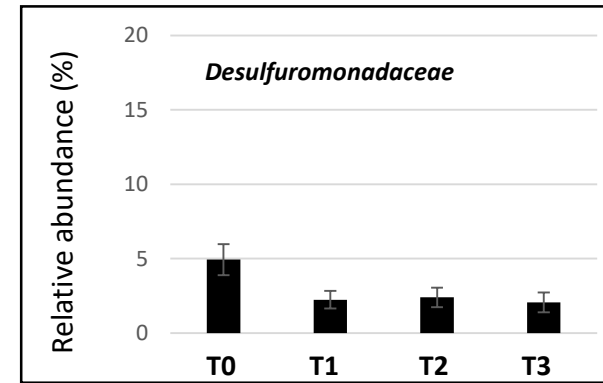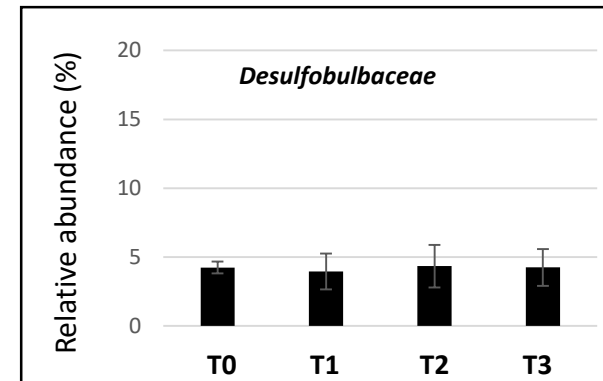

Genome characteristics of two *Desulfobacterium*-related population genomes extracted from metagenomes and two *Desulfobacterium* genomes

Figure S3

| Organism                         | IMG genome ID | Genome size (Number of total bases) | Gene count (Number of total genes) | CDS count (Number of CDS genes) | rRNA count (Number of rRNA genes) | Protein coding genes with function prediction | Protein coding genes without function prediction |
|----------------------------------|---------------|-------------------------------------|------------------------------------|---------------------------------|-----------------------------------|-----------------------------------------------|--------------------------------------------------|
| 13C Heavy 2 Bin 21               | -             | 6,489,886                           |                                    |                                 | 26                                | 3443                                          | 2156                                             |
| 13C Heavy 3 Bin 22               | -             | 6,624,919                           |                                    |                                 | 34                                | 3680                                          | 2217                                             |
| <i>D. autotrophicum</i> DMS 3383 | 643692021     | 5,657,782                           | 5012                               | 4943                            | 69                                | 3552                                          | 1391                                             |
| <i>D. vacuolatum</i> DSM 3385    | 2681813565    | 5,035,799                           | 4183                               | 4101                            | 82                                | 3302                                          | 799                                              |

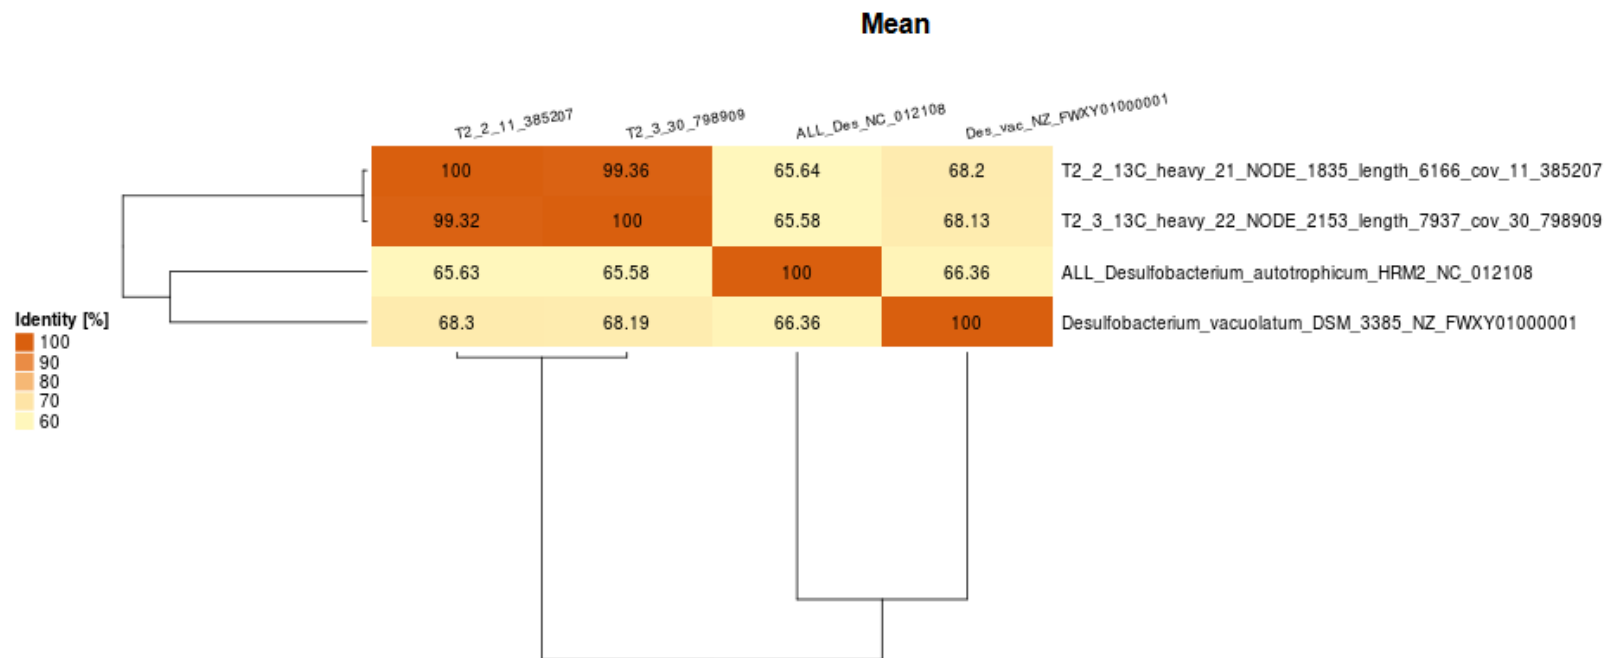

Figure S4

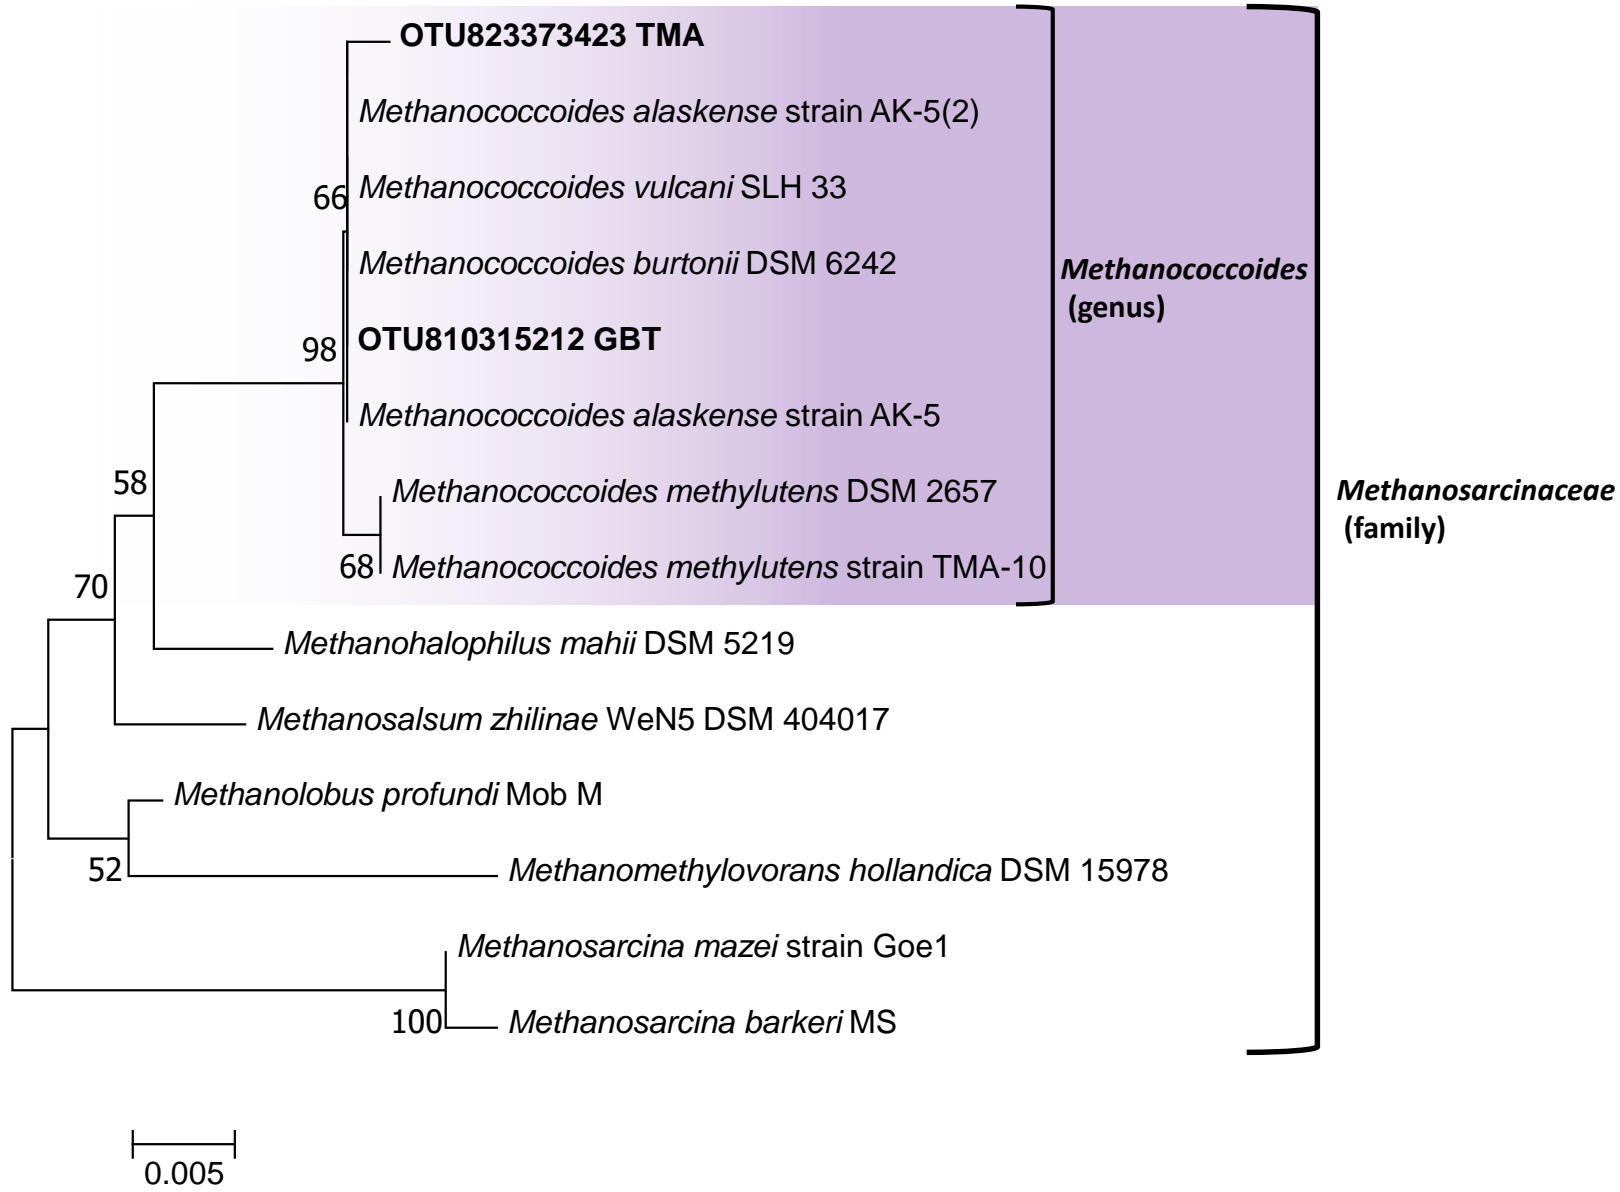

GBT microcosms

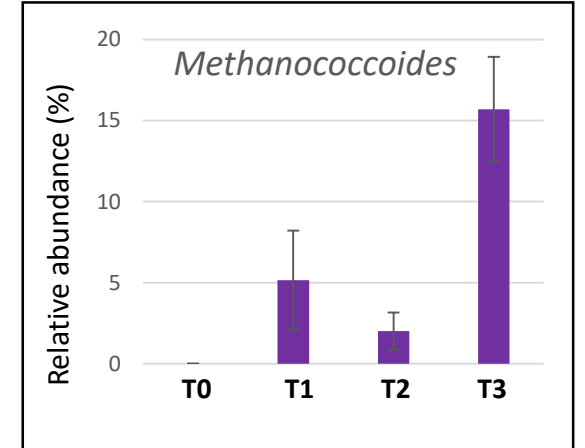

TMA microcosms

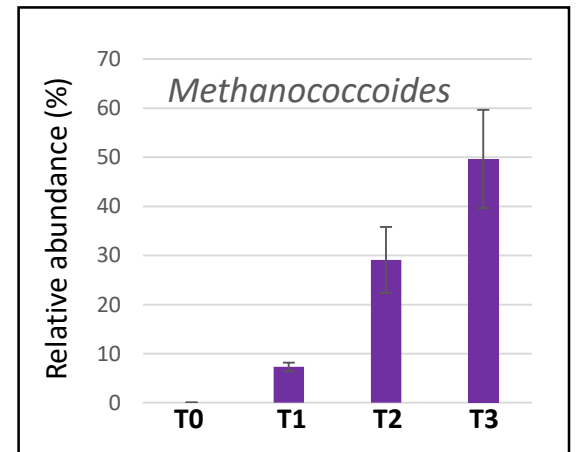

Genome characteristics of two *Methanococcoides*-related population genomes extracted from metagenomes and three *Methanococcoides* genomes

Figure S5

| Organism                       | IMG genome ID | Genome size (Number of total bases) | Gene count (Number of total genes) | CDS count (Number of CDS genes) | rRNA count (Number of rRNA genes) | Protein coding genes with function prediction | Protein coding genes without function prediction |
|--------------------------------|---------------|-------------------------------------|------------------------------------|---------------------------------|-----------------------------------|-----------------------------------------------|--------------------------------------------------|
| 13C Heavy 2 Bin 7              | -             | 1,564,734                           |                                    |                                 | 24                                | 1,105                                         | 378                                              |
| 13C Light 2 Bin 10             | -             | 924,130                             |                                    |                                 | 14                                | 725                                           | 186                                              |
| <i>M. vulcani</i> SLH 33       | 2642422537    | 2,314,846                           | 2,357                              | 2,290                           | 67                                | 1,712                                         | 578                                              |
| <i>M. burtonii</i> DSM 6242    | 637000161     | 2,575,032                           | 2,506                              | 2,431                           | 75                                | 1,566                                         | 865                                              |
| <i>M. methylutens</i> DSM 2657 | 2630968972    | 2,508,511                           | 2,527                              | 2,462                           | 10                                | 1,805                                         | 657                                              |

Average amino acid identity

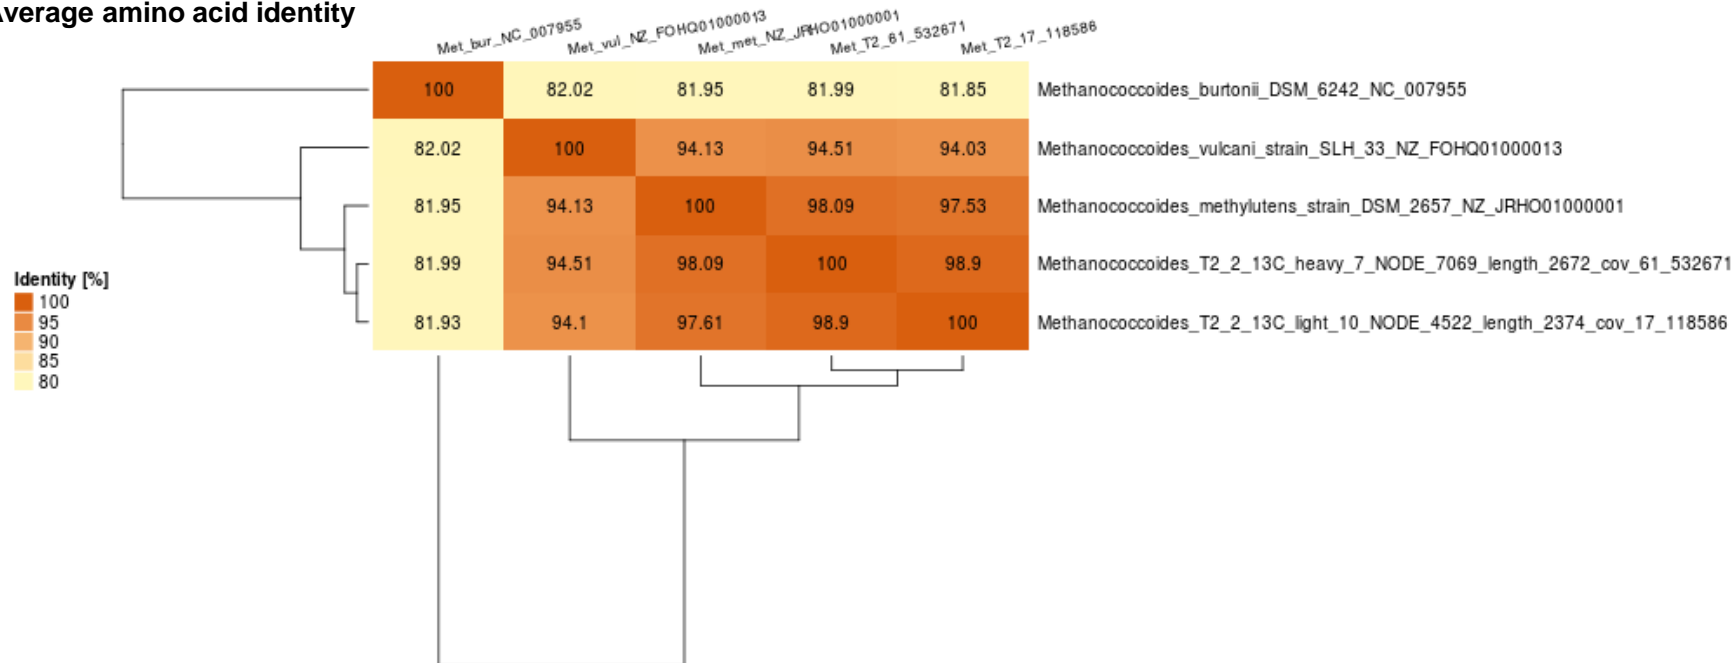

Figure S6

a) T0 T1 T2 T3  
 $^{13}\text{C}_2\text{-GBT}$   $^{12}\text{C}\text{-GBT}$   $^{13}\text{C}_2\text{-GBT}$   $^{12}\text{C}\text{-GBT}$   $^{13}\text{C}_2\text{-GBT}$   $^{12}\text{C}\text{-GBT}$

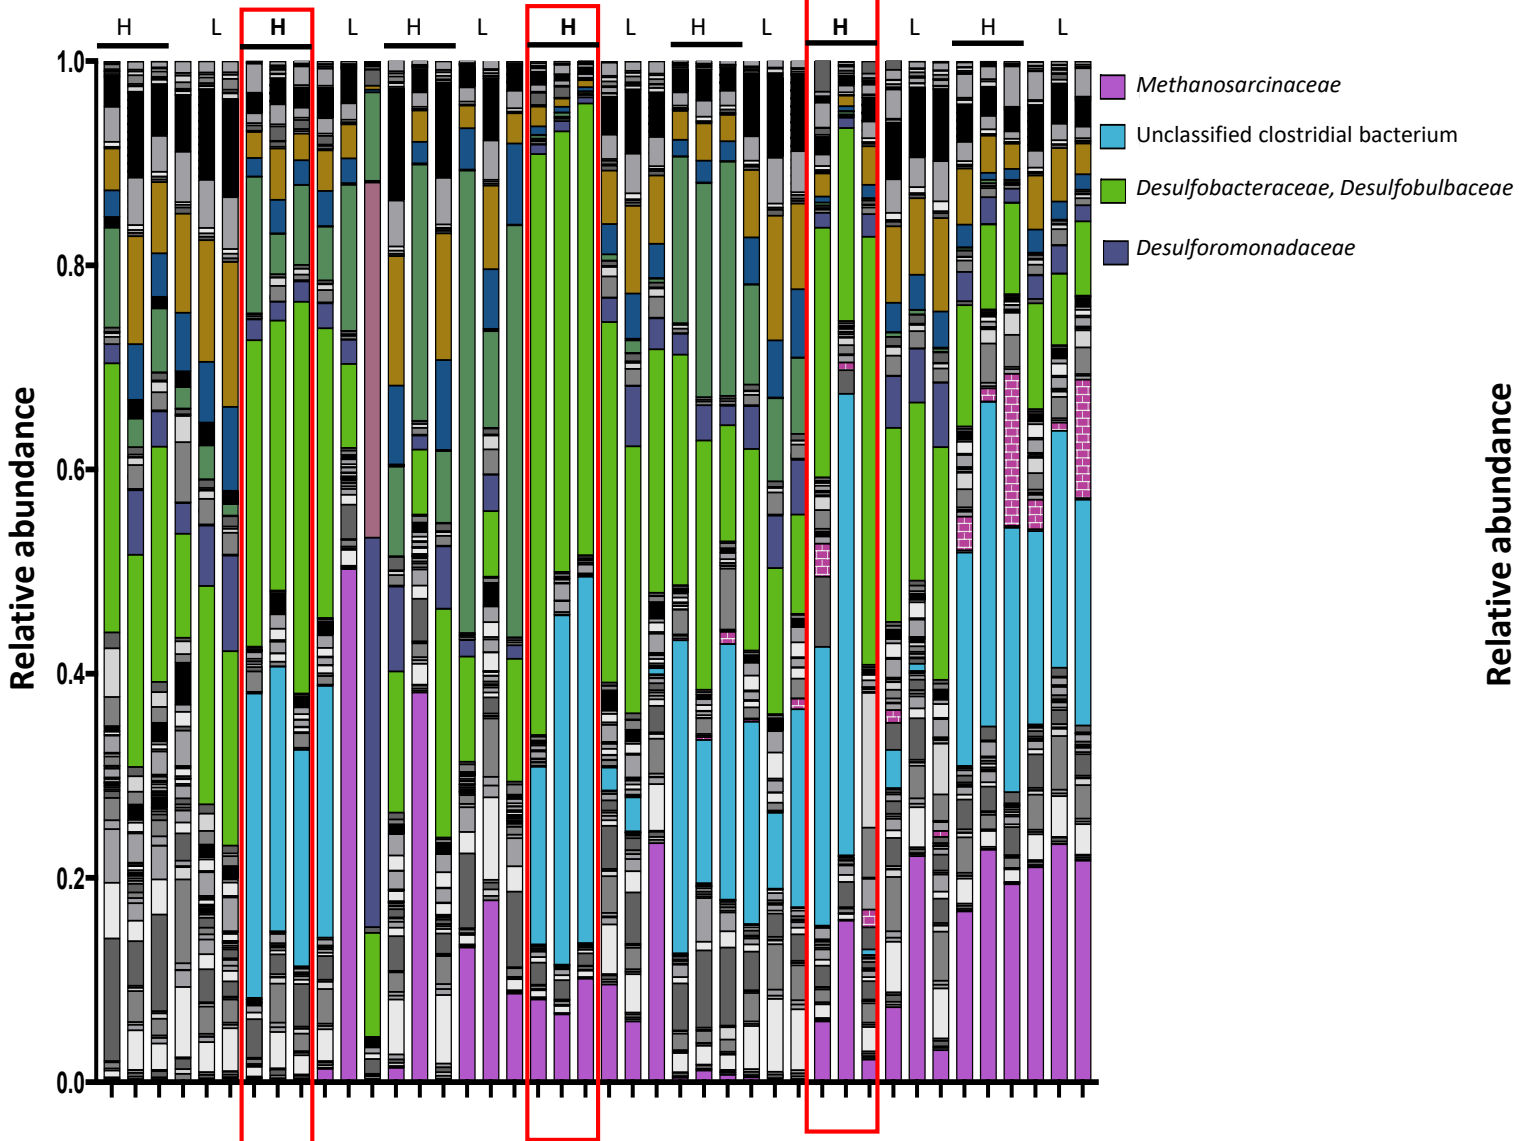

b) T0 T2 T3  
 $^{13}\text{C}_3\text{-TMA}$   $^{12}\text{C}\text{-TMA}$   $^{13}\text{C}_3\text{-TMA}$   $^{12}\text{C}\text{-TMA}$

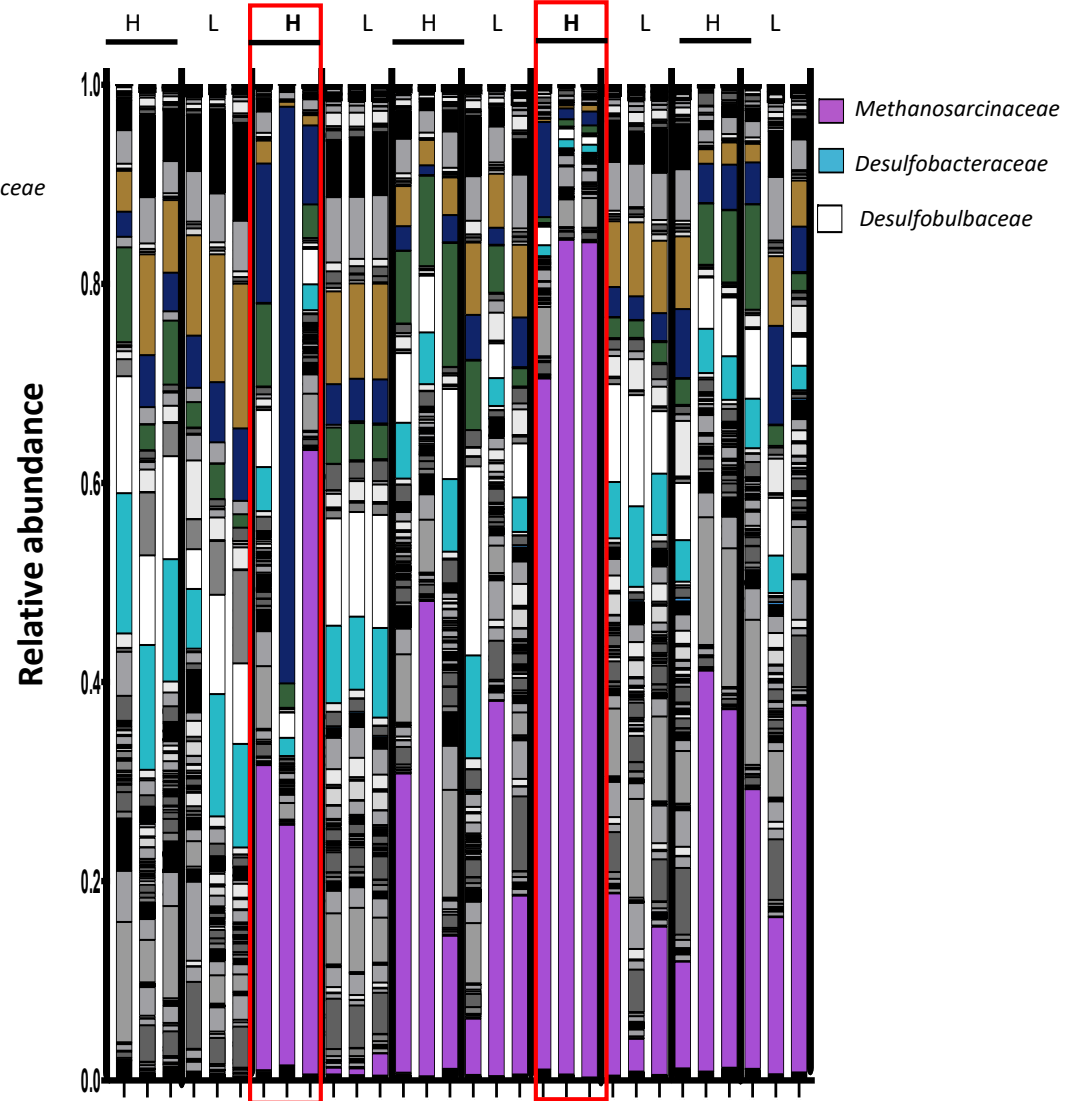

Figure S7

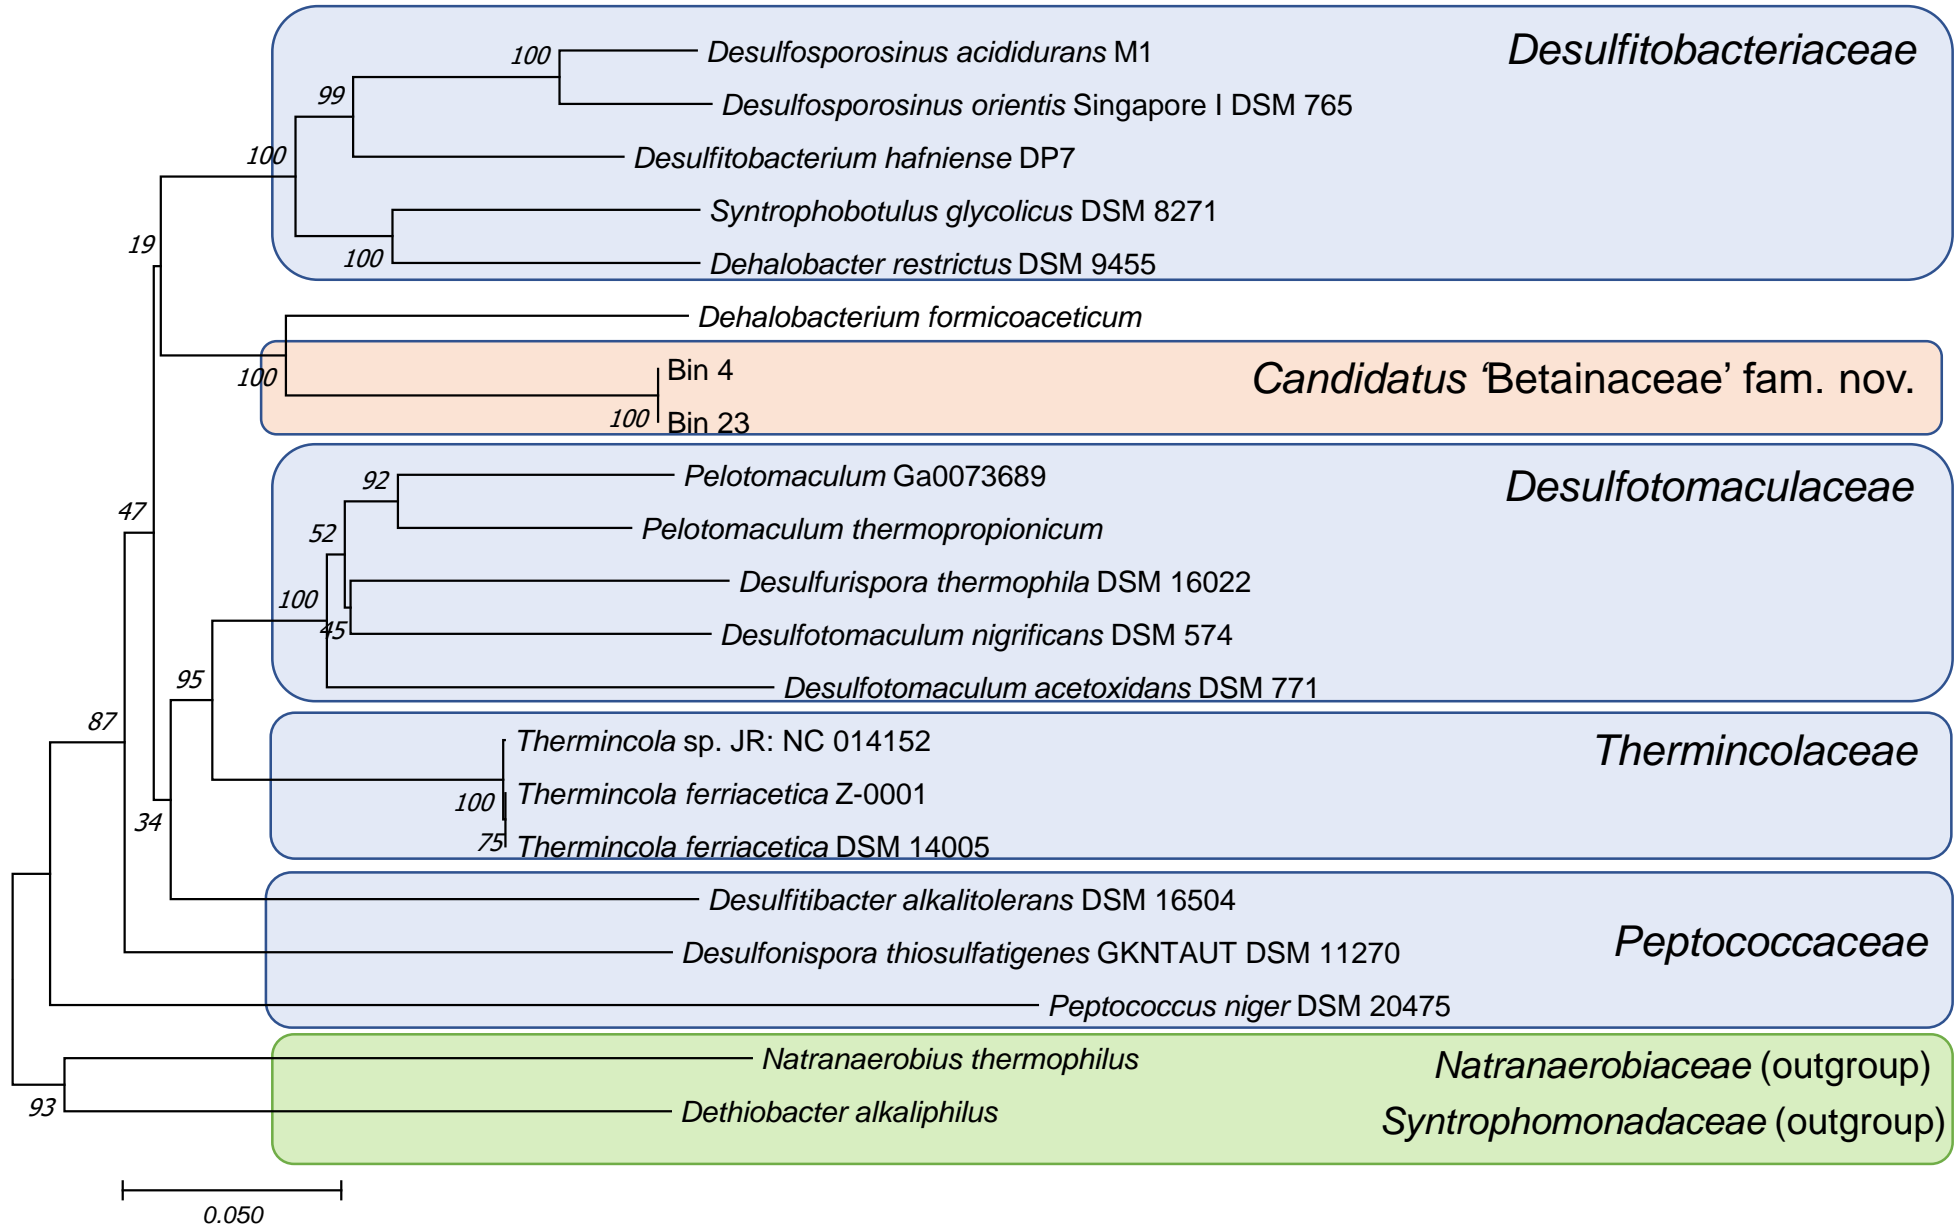

Figure S8

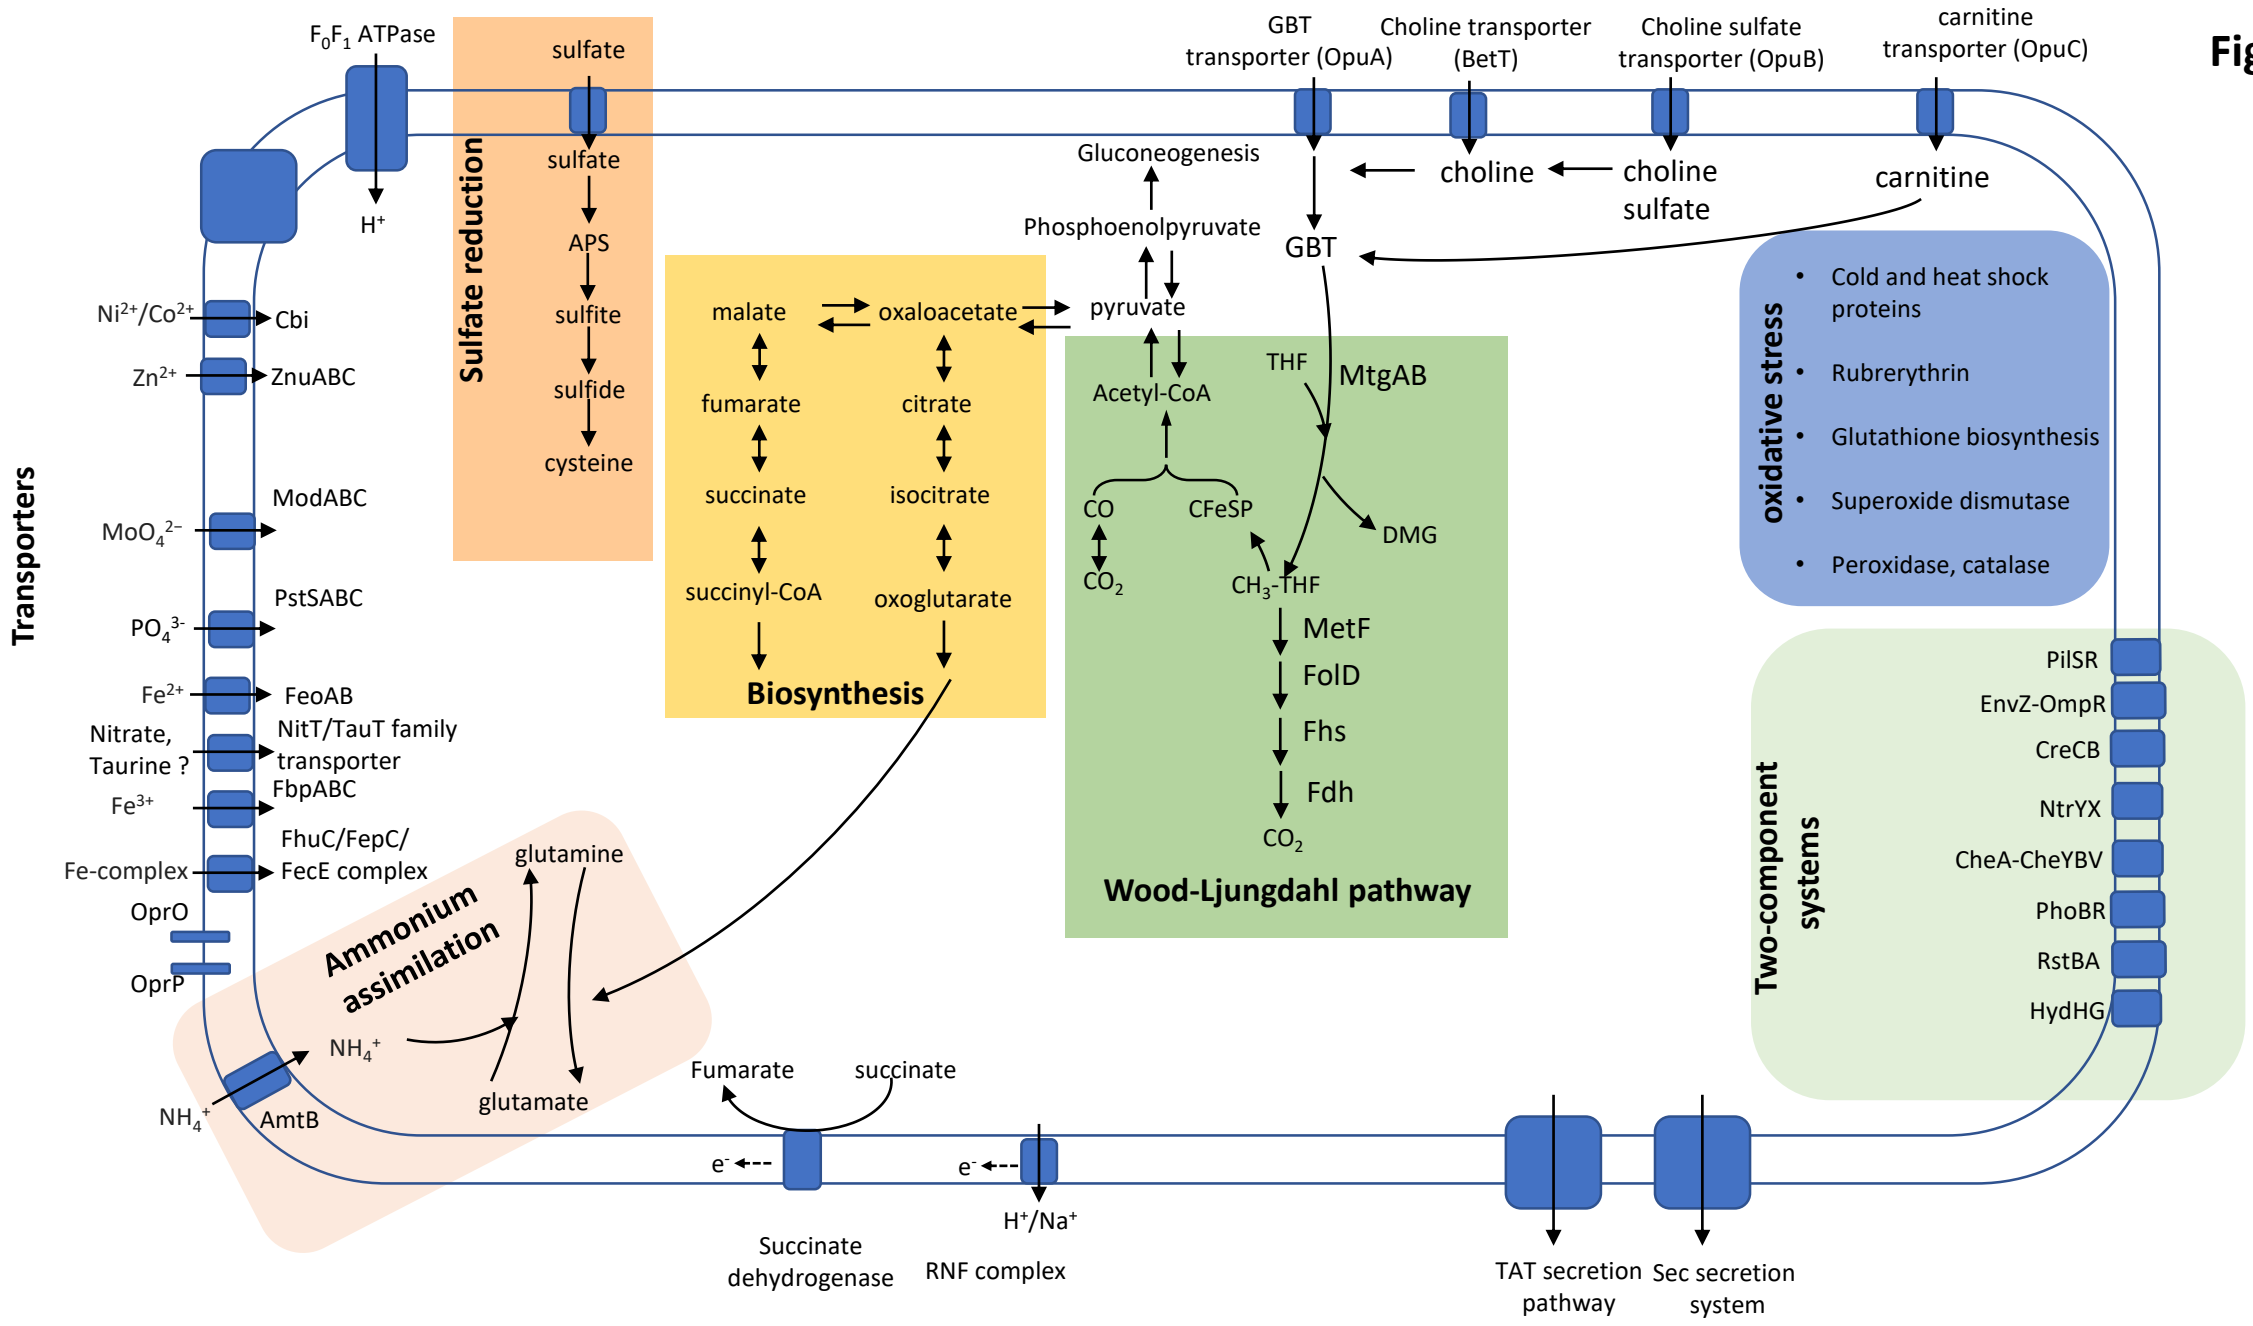

Supplement: 40168_2019_732_MOESM6_ESM.pdf [file 40168_2019_732_MOESM6_ESM.pdf]
